# Supplementary material for: Synchronous and Metachronous Thoracic Aortic Aneurysms in Patients With Abdominal Aortic Aneurysms: A Systematic Review and Meta‐Analysis
Source: PubMed Central journal article supplement — J Am Heart Assoc. 2020 Oct 26;9(21):e017468. doi: 10.1161/JAHA.120.017468 (PMC7763396; doi:10.1161/jaha.120.017468), 2020-10-26
Supplement: JAH3-9-e017468-s001.pdf [file JAH3-9-e017468-s001.pdf]

# **SUPPLEMENTAL MATERIAL**

**Table S1. Research strategy.**

1. Exp Aortic Aneurysm, Thoracic/
2. Exp Aneurysm, Ruptured/
3. ((thoracoabdominal or thoraco-abdominal or thorax or thoracic) adj3 (aneurysm or dilated or ectasia) adj3 (aorta or aortic)).ti,ab,kw.
4. 1 or 2 or 3
5. Incidence/ or incidence.ti.ab.kw.
6. Epidemiologic studies/
7. Cohort studies/ or cohort.ti.ab.kw.
8. Prevalence/ or prevalence.ti.ab.kw
9. 5 or 6 or 7 or 8
10. 4 and 9
11. Exp animals/ not humans.sh.
12. 10 not 11

**Figure S1. Risk of Bias – CASP cohort study checklist.**

|                               | 1. Are the results of the study valid? | 2. Was the cohort recruited in an acceptable way? | 3. Was the exposure accurately measured to minimise bias? | 4. Was the outcome accurately measured to minimise bias? | 5. a) Have the authors identified all important confounding factors – age, smoking, hypertension | 5. b) Have they taken account of the confounding factors in the design and/or analysis? | 9. Do you believe in the results? | 10. Can the results be applied to the local population? | 11. Do the results of this study fit with other available evidence? | Overall risk of bias: high or low |
|-------------------------------|----------------------------------------|---------------------------------------------------|-----------------------------------------------------------|----------------------------------------------------------|--------------------------------------------------------------------------------------------------|-----------------------------------------------------------------------------------------|-----------------------------------|---------------------------------------------------------|---------------------------------------------------------------------|-----------------------------------|
| Larsson 2011 <sup>15</sup>    | L                                      | L                                                 | L                                                         | L                                                        | H                                                                                                | H                                                                                       | L                                 | L                                                       | L                                                                   | H                                 |
| Chaer 2012 <sup>4</sup>       | L                                      | L                                                 | L                                                         | L                                                        | L                                                                                                | H                                                                                       | L                                 | L                                                       | L                                                                   | L                                 |
| Takigawa 2012 <sup>18</sup>   | L                                      | H                                                 | U                                                         | L                                                        | H                                                                                                | H                                                                                       | L                                 | L                                                       | L                                                                   | H                                 |
| Agricola 2013 <sup>14</sup>   | L                                      | H                                                 | U                                                         | H                                                        | H                                                                                                | H                                                                                       | L                                 | L                                                       | L                                                                   | H                                 |
| Wallinder 2018 <sup>17</sup>  | L                                      | L                                                 | L                                                         | L                                                        | H                                                                                                | H                                                                                       | L                                 | L                                                       | L                                                                   | H                                 |
| Dombrowski 2019 <sup>16</sup> | L                                      | L                                                 | L                                                         | L                                                        | L                                                                                                | H                                                                                       | L                                 | L                                                       | L                                                                   | L                                 |

| Original CASP items                                                                      | Adapted CASP items                                                                                | Reasons for downgrading                                                                              |
|------------------------------------------------------------------------------------------|---------------------------------------------------------------------------------------------------|------------------------------------------------------------------------------------------------------|
| 1. Did the study address a clearly focused issue?                                        | 1. Did the study address a clearly focused issue?                                                 |                                                                                                      |
| 2. Was the cohort recruited in an acceptable way?                                        | 2. Was the cohort recruited in an acceptable way?                                                 | Not including every AAA with a diameter equal or higher than 30mm                                    |
| 3. Was the exposure accurately measured to minimise bias?                                | 3. Was the exposure accurately measured to minimise bias?                                         | No clear explanation of how the diagnosis of AAA was obtained                                        |
| 4. Was the outcome accurately measured to minimise bias?                                 | 4. Was the outcome accurately measured to minimise bias?                                          | Did not use either chest MR or CT to diagnose a TAA                                                  |
| 5. (a) Have the authors identified all important confounding factors?                    | 5. (a) Have the authors identified all important confounding factors – age, smoking, hypertension | These risk factors have not been identified and quantified in the overall cohort and outcome group   |
| 5. (b) Have they taken account of the confounding factors in the design and/or analysis? | 5. (b) Have they taken account of the confounding factors in the design and/or analysis?          | No adjustment has been made for confounding factors (age, smoking, hypertension)                     |
| 6. (a) Was the follow up of subjects complete enough?                                    | Not used – not applicable                                                                         |                                                                                                      |
| 6. (b) Was the follow up of subjects long enough?                                        | Not used – not applicable                                                                         |                                                                                                      |
| 7. What are the results of this study?                                                   | Not used – not applicable (open question format)                                                  |                                                                                                      |
| 8. How precise are the results?                                                          | Not used – not applicable (open question format)                                                  |                                                                                                      |
| 9. Do you believe the results?                                                           | 9. Do you believe the results?                                                                    | No clear definition of TAA and methods used for diagnosis are provided                               |
| 10. Can the results be applied to the local population?                                  | 10. Can the results be applied to the local population?                                           | The population is not a valid cohort for AAA patients in a hospital/community setting                |
| 11. Do the results of this study fit with other available evidence?                      | 11. Do the results of this study fit with other available evidence?                               | The results are not in concordance with the overall available data regarding synchronous TAA and AAA |
| 12. What are the implications of this study for practice?                                | Not used – not applicable (open question format)                                                  |                                                                                                      |

Risk of Bias using CASP cohort study checklist<sup>13</sup>. H: High risk of bias; U: Unclear risk of bias; L: Low risk of bias. This tool was adapted from the CASP cohort study checklist, in which we used 9 out of the 14 original items. The table below shows the changes made and what was considered to downgrade the risk of Bias.
